# Supplementary material for: Black chokeberry (Aronia melanocarpa L.) polyphenols attenuate obesity-induced colonic inflammation by regulating gut microbiota and the TLR4/NF-κB signaling pathway in high fat diet-fed rats
Source: Royal Society of Chemistry journal article supplement (doi:10.1039/d3fo02177g), 2023-01-01
Supplement: d3fo02177g1.pdf [file d3fo02177g1.pdf]

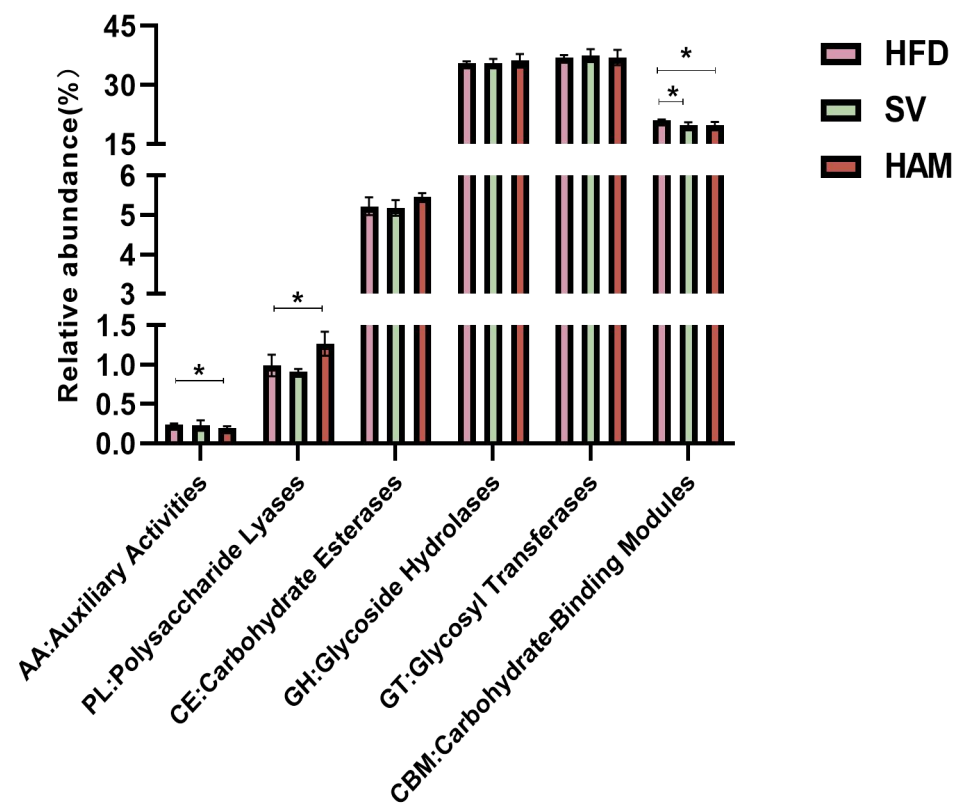

Supplementary Fig.1 The relative abundance of CAZy classes (e.g., AA, CBM, CE, GH, GT and PL) at level 1 in obesity-induced colonic inflammation rats. Values are means  $\pm$  SEM.  
\* $p$ <0.05 and \*\* $p$ <0.01 when comparing other groups with HFD group.

**A**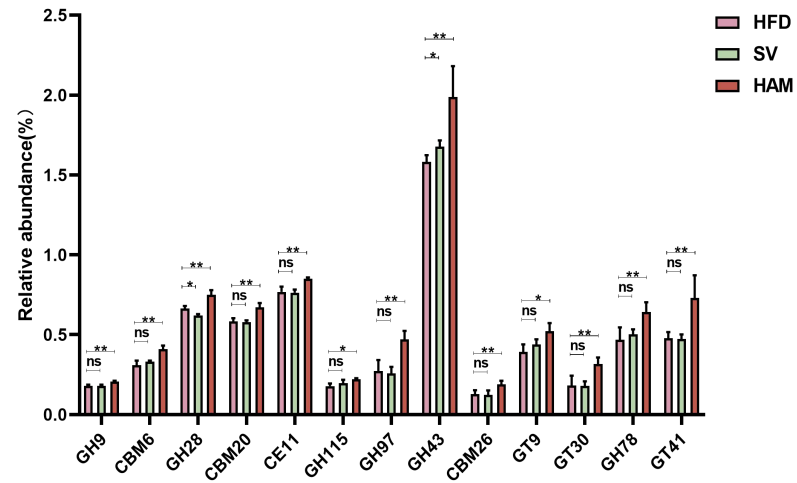**B**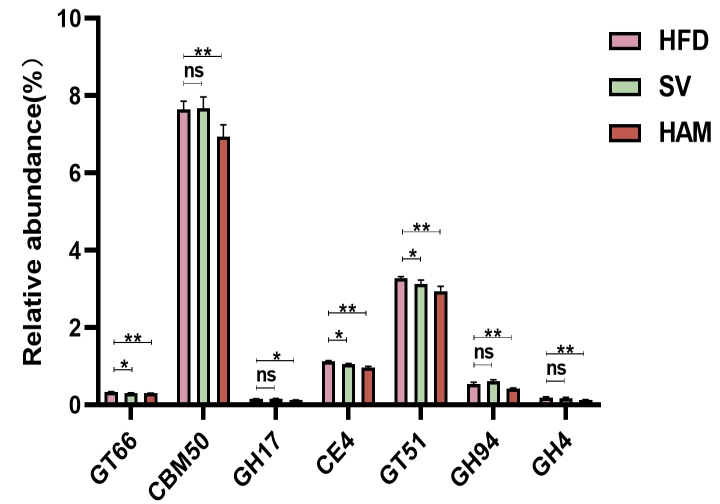

**Supplementary Fig.2** The relative abundance of CAZy subclasses at level 2 in obesity-induced colonic inflammation rats. (A) the relative abundance of CAZy subclasses was increased in the HAM group compared with the HFD group; (B) the relative abundance of CAZy subclasses was decreased in the HAM group compared with the HFD group. Values are means  $\pm$  SEM. \* $p < 0.05$  and \*\* $p < 0.01$  when comparing other groups with HFD group.

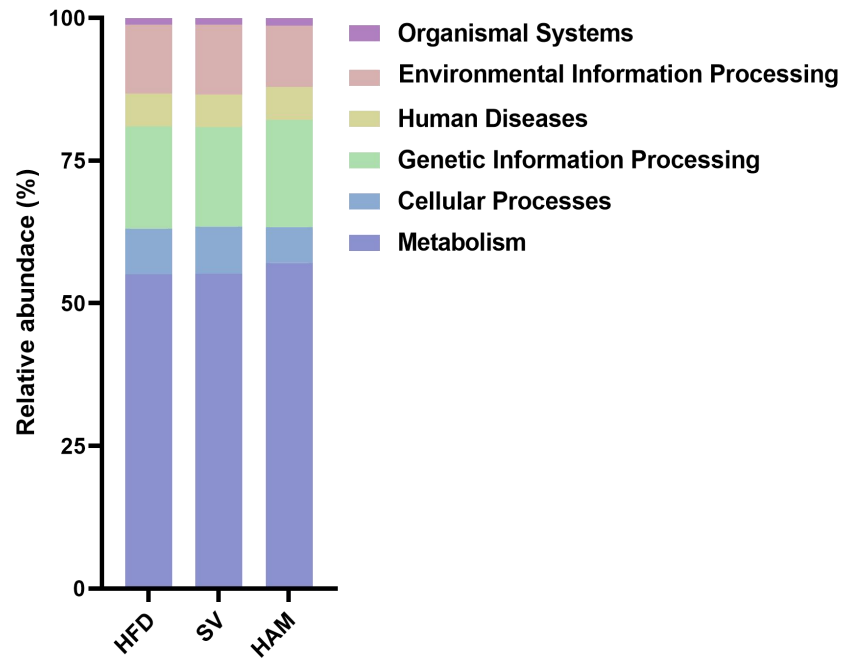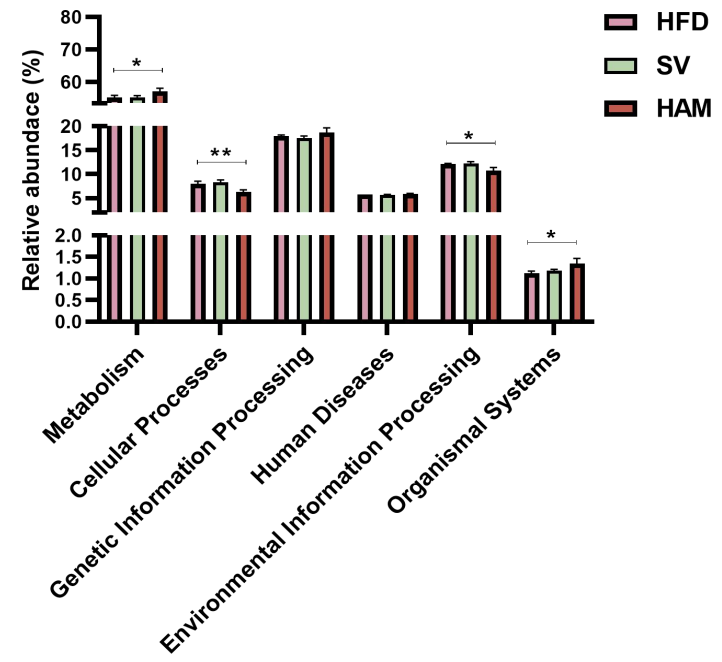

Supplementary Fig.3 KEGG pathways comparisons at level 1 among the HFD group, SV group and HAM group. Values are means  $\pm$  SEM. \* $p < 0.05$  and \*\* $p < 0.01$  when comparing other groups with HFD group.

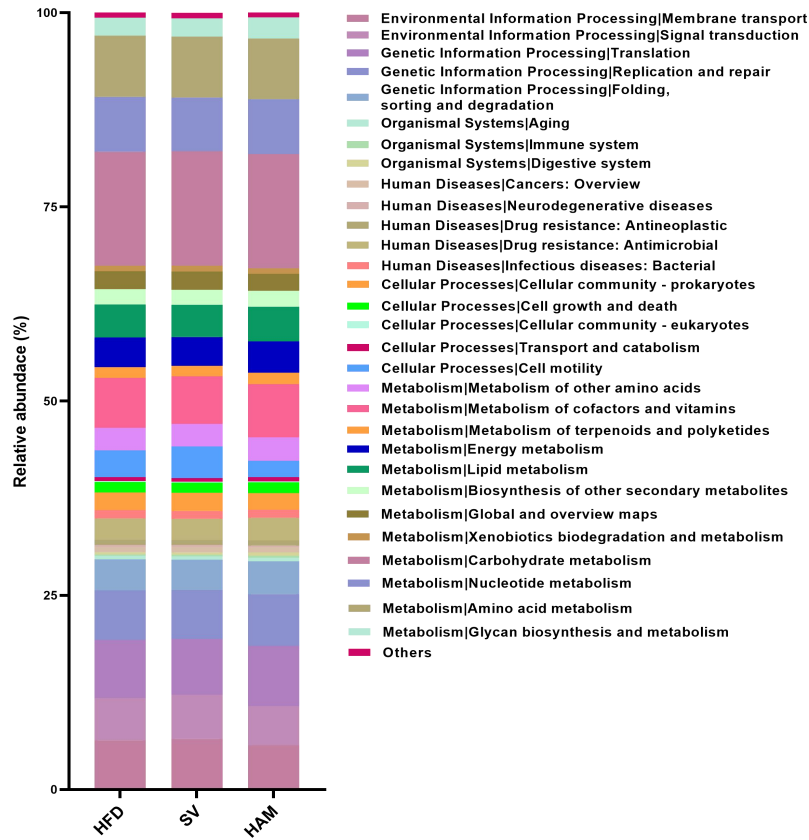

Metabolism|Lipid metabolism

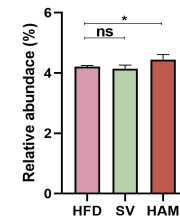

Metabolism|Glycan biosynthesis and metabolism

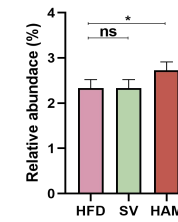

Human Diseases|Infectious diseases: Bacterial

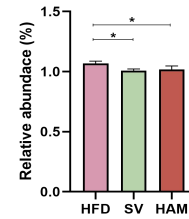

Human Diseases|Drug resistance: Antineoplastic

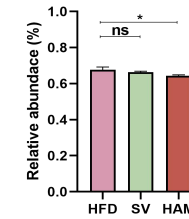

Environmental Information Processing|Signal transduction

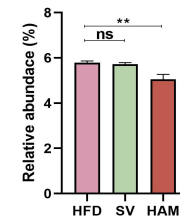

Organismal Systems|Digestive system

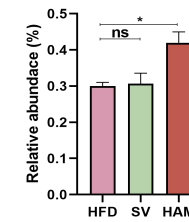

Supplementary Fig.4 KEGG pathways comparisons at level 2 among the HFD group, SV group and HAM group. Values are means  $\pm$  SEM. \* $p < 0.05$  and \*\* $p < 0.01$  when comparing other groups with HFD group.
