# Supplementary material for: Black chokeberry (Aronia melanocarpa L.) polyphenols attenuate obesity-induced colonic inflammation by regulating gut microbiota and the TLR4/NF-κB signaling pathway in high fat diet-fed rats
Source: Royal Society of Chemistry journal article supplement (doi:10.1039/d3fo02177g), 2023-01-01
Supplement: d3fo02177g2.xlsx [file d3fo02177g2.xlsx]

## Sheet: Supplementary table 1
Supplementary Table 1 Chemical characterisation of the polyphenols extract from chokeberry
	Extract content (mg/100 g dry weight)	Daily intake1 (mg/kg body weight)
Total polyphenols	8914.68 ± 110.37	89.15
(+) - catechin	17.74 ± 2.12	0.18
(‒) - epicatechin	181.15 ± 6.34	1.81
Chlorogenic acid	410.62 ± 70.45	4.11
cis-Tiliroside	55.23 ± 3.79	0.55
Procyanidins	4535.12 ± 80.13	45.35
Procyanidin B1	36.86 ±.099	0.37
Procyanidin B2	255 ± 8.77	2.55
Procyanidin C1	26.12 ± 1.26	0.26
Anthocyanin	2146.82 ± 70.65	21.47
Cyanidin-3-galactoside chloride	1112.14 ± 40.65	11.12
Cyanidin 3-monoarabinoside	370.69 ± 40.37	3.71
Cyanidin 3-Xyloside	55.33 ± 2.28	0.55
Cyanidin 3-O-glucoside chloride	65.98 ± 3.32	0.66
1: Daily intake was calculated based on the 1000 mg of chokeberry poly phenols extract/kg of body weight dose orally given to rats for 40 days.

## Sheet: Supplementary table 2
Supplementary Table 2 Primer list for the qPCR analysis
Gene Name	Forward	Reverse
β-actin	CGTTGACATCCGTAAAGACC	CTAGGAGCCAGGGCAGTAATC
TNF-α	ATGGGCTCCCTCTCATCAGT	GCTTGGTGGTTTGCTACGAC
IL-6	CCCCAATTTCCAATGCTCTCC	CGCACTAGGTTTGCCGAGTA
IL-1β	GCCTTGGGCCTCAAAGGAAAGAATC	GGAAGACACCGATTCCATGGTGAAG
MCP-1	TGTCTCAGCCAGATGCAGTT	TGTCTCAGCCAGATGCAGTT
ZO-1	GCCCAGAGTGAAGGCAATTC	TCACAGTGTGGCAAGCGTAG
Occludin	GAGGCTATGGCTATGGCTATGG	AGGAAGCGATGAAGCAGAAGG
Claudin-1	GGGGACAACATCGTGACCG	AGGAGTCGAAGACTTTGCACT
TLR4	TTCACCTCTGCCTTCACTAC	GACACTACCACAATAACCTTCC
MyD88	TCGACGCCTTCATCTGCTAC	ACCATGCGACGACACCTTTT

## Sheet: Supplementary table 3
Supplementary Table 3 Data statistics of gut metagenome sequencing from different samples
Sample	Raw data		Clean data		Ratio of Reads (%)	Ratio of Bases (%)	Q20%	Q30%	GC%
	Reads	Bases (Gbp)	Reads	Bases (Gbp)
HFD1	75152700	11.27	74363902	11.06	98.95	98.09	96.94	92	49.69
HFD2	75152660	11.27	68223270	10.14	90.78	89.97	96.77	91.61	51.14
HFD3	76870620	11.53	70392706	10.46	91.57	90.72	96.63	91.24	55.37
SV1	85522042	12.83	71314436	10.6	83.39	82.64	96.73	91.45	54.64
SV2	68671492	10.3	68012314	10.1	99.04	98.1	96.68	91.42	50.95
SV3	70947694	10.64	68995468	10.25	97.25	96.27	96.89	91.88	51.14
HAM1	69562958	10.43	69103674	10.3	99.34	98.7	96.87	91.69	53.01
HAM2	73044378	10.96	69086078	10.27	94.58	93.76	96.65	91.3	52.88
HAM3	75872046	11.38	71041524	10.56	93.63	92.81	96.86	91.87	47.95
HAM4	75524163	11.33	71445236	10.58	94.6	93.38	96.59	91.28	49.93

## Sheet: Supplementary table 4
Supplementary Table 4 Assembly results of each sample
Sample	Total sequences	Total bases (bp)	Min length(bp)	Max length (bp)	Average length (bp)	N50 (bp)	GC%	Ns%
HFD1	761053	717543935	200	373357	942.83	1302	49.71	0
HFD2	757343	704405105	200	489125	930.1	1177	50.54	0
HFD3	587403	579662769	200	314341	986.82	1368	53.37	0
SV1	702383	731238774	200	368278	1041.08	1519	52.94	0
SV2	713706	687865625	200	362261	963.79	1286	50.71	0
SV3	735197	669491825	200	698141	910.63	1221	51.18	0
HAM1	530446	566342906	200	748123	1067.67	1670	51.55	0
HAM2	717260	714505562	200	372226	996.16	1417	51.75	0
HAM3	557120	583114874	200	818036	1046.66	1665	46.3	0
