# Supplementary figures and images for: Black chokeberry (Aronia melanocarpa L.) polyphenols attenuate obesity-induced colonic inflammation by regulating gut microbiota and the TLR4/NF-κB signaling pathway in high fat diet-fed rats
Source: Royal Society of Chemistry journal article supplement (doi:10.1039/d3fo02177g), 2023-01-01

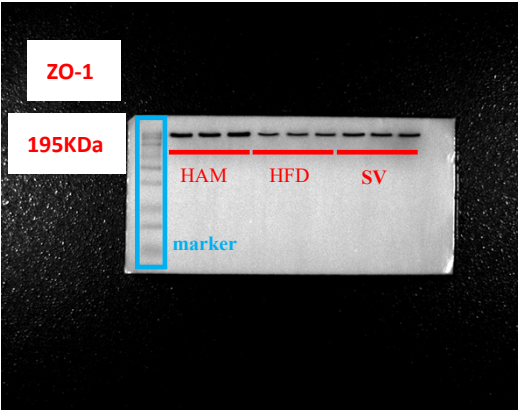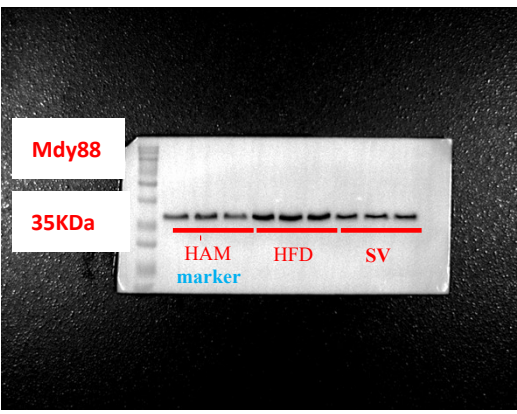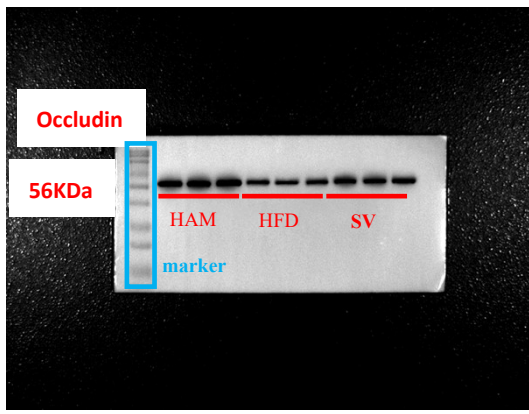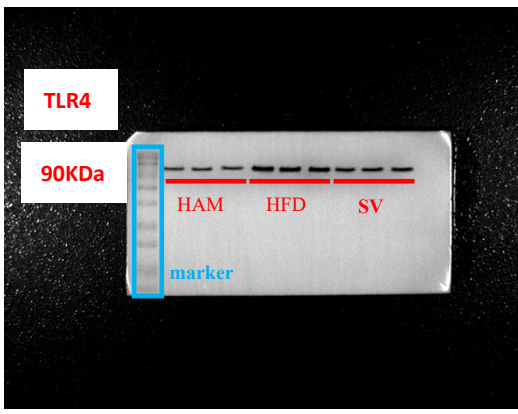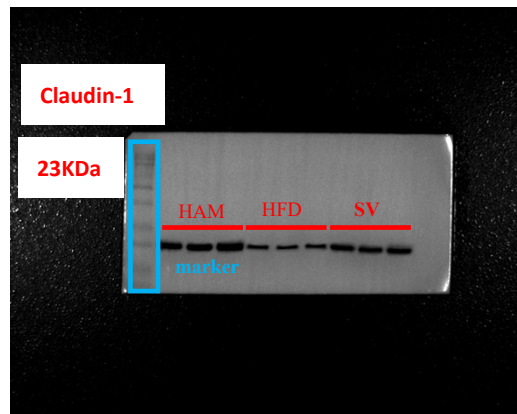

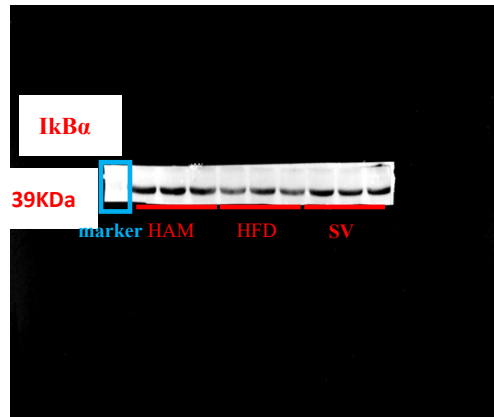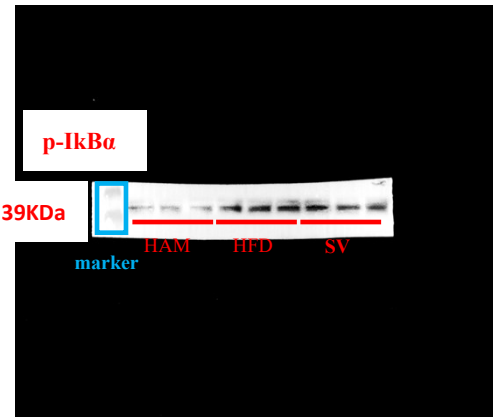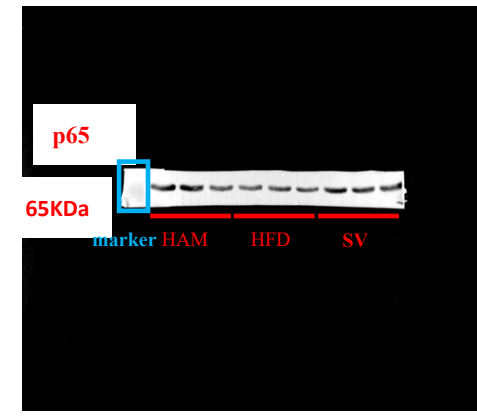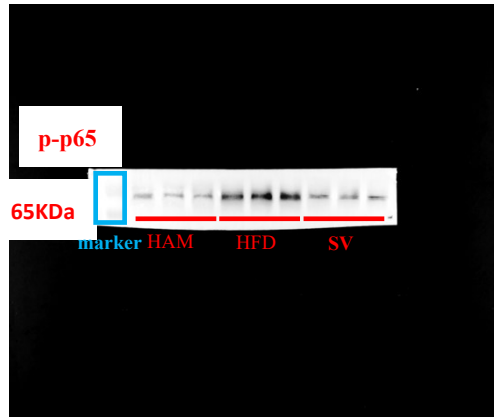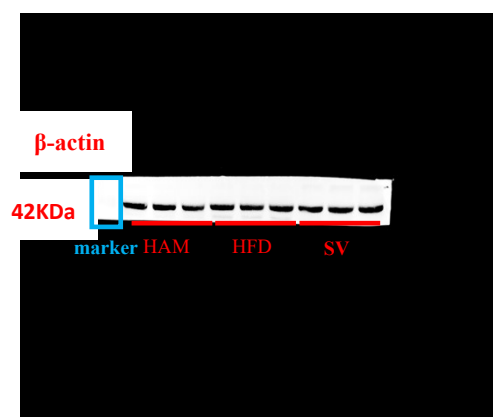

Supplement: d3fo02177g3.pdf [file d3fo02177g3.pdf]
